# Supplementary material
Source: ML conference proceedings conference paper supplement (https://proceedings.neurips.cc/paper_files/paper/2021/hash/92a08bf918f44ccd961477be30023da1-Abstract.html)
Supplement: Supplementary file [file 92a08bf918f44ccd961477be30023da1-Supplemental.pdf]

## A Appendix

Derivation of the data-fitting term of (12). We make use of the multi-linearity property of the CPD and rely on re-ordering the summations:

$$\begin{aligned}
\langle \mathcal{W}, \mathcal{Z}(\mathbf{x}) \rangle_{\text{F}} &= \left\langle \sum_{r=1}^R \mathbf{w}_r^{(1)} \otimes \mathbf{w}_r^{(2)} \otimes \dots \otimes \mathbf{w}_r^{(D)}, \mathbf{z}^{(1)} \otimes \mathbf{z}^{(2)} \dots \otimes \mathbf{z}^{(D)} \right\rangle_{\text{F}} \\
&= \sum_{i_1=1}^{\hat{M}} \dots \sum_{i_d=1}^{\hat{M}} \dots \sum_{i_D=1}^{\hat{M}} \sum_{r=1}^R w_{i_1 r}^{(1)} z_{i_1}^{(1)} \dots w_{i_d r}^{(d)} z_{i_d}^{(d)} \dots w_{i_D r}^{(D)} z_{i_D}^{(D)} \\
&= \sum_{i_d=1}^{\hat{M}} \sum_{r=1}^R w_{i_d r}^{(d)} \left( z_{i_d}^{(d)} \sum_{i_1=1}^{\hat{M}} w_{i_1 r}^{(1)} z_{i_1}^{(1)} \dots \sum_{i_D=1}^{\hat{M}} w_{i_D r}^{(D)} z_{i_D}^{(D)} \right) \\
&= \text{vec} \left( \mathbf{W}^{(d)} \right)^{\text{T}} \left( \mathbf{z}^{(d)} \otimes \left( \mathbf{z}^{(1)\text{T}} \mathbf{W}^{(1)\text{T}} \odot \dots \odot \mathbf{z}^{(D)\text{T}} \mathbf{W}^{(D)\text{T}} \right) \right) \\
&= \left\langle \text{vec} \left( \mathbf{W}^{(d)} \right), \mathbf{g}^{(d)}(\mathbf{x}) \right\rangle
\end{aligned}$$

The derivation of the regularization term of (13) follows a similar reasoning as for the data-fitting term:

$$\begin{aligned}
\langle \mathcal{W}, \mathcal{W} \rangle_{\text{F}} &= \left\langle \sum_{r=1}^R \mathbf{w}_r^{(1)} \otimes \mathbf{w}_r^{(2)} \otimes \dots \otimes \mathbf{w}_r^{(D)}, \sum_{r=1}^R \mathbf{w}_r^{(1)} \otimes \mathbf{w}_r^{(2)} \otimes \dots \otimes \mathbf{w}_r^{(D)} \right\rangle_{\text{F}} \\
&= \sum_{i_1=1}^{\hat{M}} \dots \sum_{i_d=1}^{\hat{M}} \dots \sum_{i_D=1}^{\hat{M}} \sum_{r=1}^R \sum_{p=1}^R w_{i_1 r}^{(1)} w_{i_1 p}^{(1)} \dots w_{i_d r}^{(d)} w_{i_d p}^{(d)} \dots w_{i_D r}^{(D)} w_{i_D p}^{(D)} \\
&= \sum_{r=1}^R \sum_{p=1}^R \left( \sum_{i_d=1}^{\hat{M}} w_{i_d r}^{(d)} w_{i_d p}^{(d)} \right) \left( \sum_{i_1=1}^{\hat{M}} w_{i_1 r}^{(1)} w_{i_1 p}^{(1)} \dots \sum_{i_D=1}^{\hat{M}} w_{i_D r}^{(D)} w_{i_D p}^{(D)} \right) \\
&= \sum_{r=1}^R \sum_{p=1}^R \left( \mathbf{w}_r^{(d)\text{T}} \mathbf{w}_p^{(d)} \right) \left( \mathbf{w}_r^{(1)\text{T}} \mathbf{w}_p^{(1)} \odot \dots \odot \mathbf{w}_r^{(D)\text{T}} \mathbf{w}_p^{(D)} \right) \\
&= \text{vec} \left( \mathbf{W}^{(d)\text{T}} \mathbf{W}^{(d)} \right)^{\text{T}} \text{vec} \left( \mathbf{W}^{(1)\text{T}} \mathbf{W}^{(1)} \odot \dots \odot \mathbf{W}^{(D)\text{T}} \mathbf{W}^{(D)} \right) \\
&= \left\langle \text{vec} \left( \mathbf{W}^{(d)\text{T}} \mathbf{W}^{(d)} \right), \text{vec} \left( \mathbf{H}^{(d)} \right) \right\rangle
\end{aligned}$$
